# Supplementary material for: HnRNPK/miR-223/FBXW7 feedback cascade promotes pancreatic cancer cell growth and invasion
Source: PubMed Central journal article supplement (PMC5386752; doi:10.18632/oncotarget.15529), 2017-02-20
Supplement: oncotarget-08-20165-s001.pdf [file oncotarget-08-20165-s001.pdf]

# HnRNPK/miR-223/FBXW7 feedback cascade promotes pancreatic cancer cell growth and invasion

## SUPPLEMENTARY FIGURE

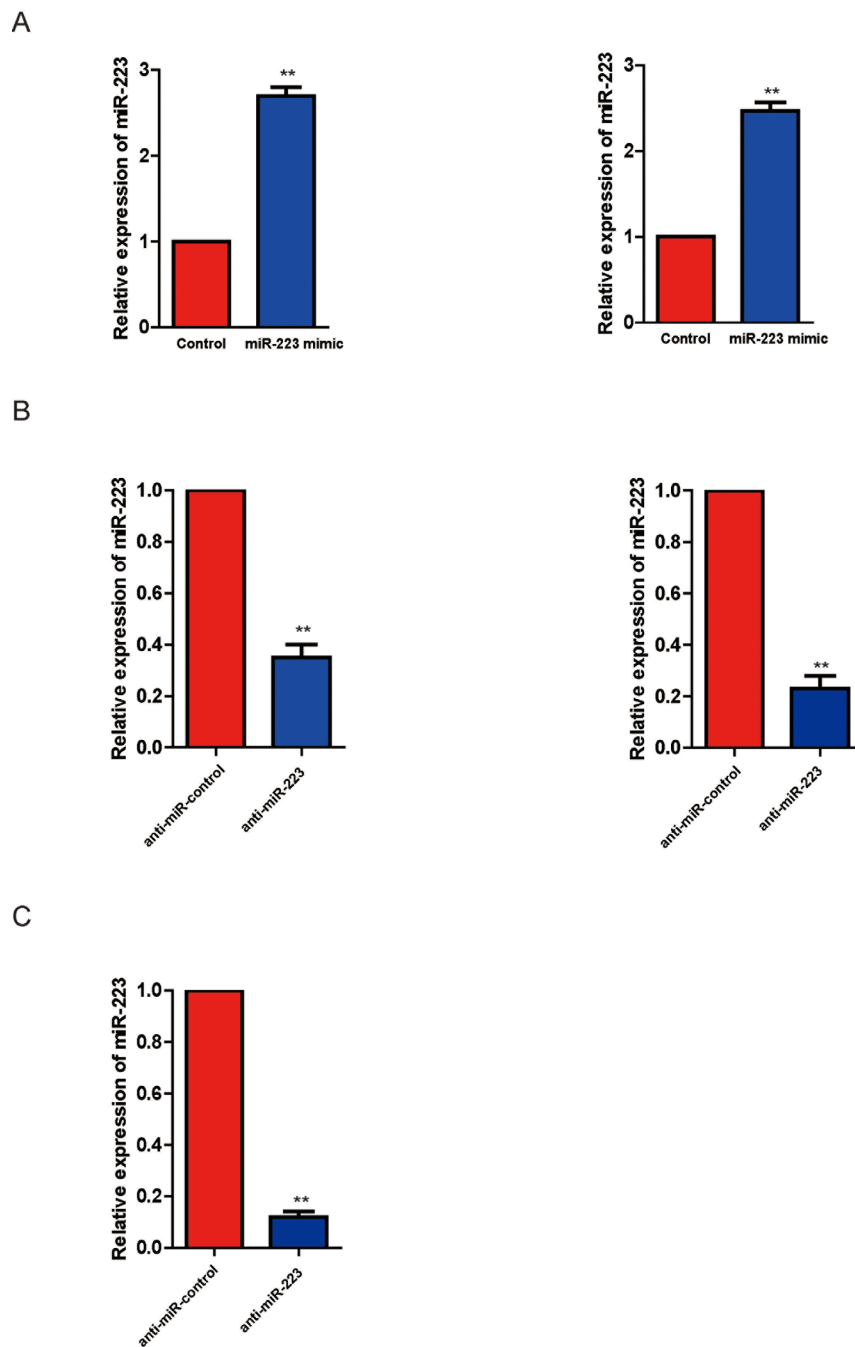

Supplementary Figure 1: The change in relative levels of miR-223 in PDAC cells A and B, or tissues C, treated as indicated.
